# Supplementary material for: Understanding the nature of “superhard graphite”
Source: PubMed Central journal article supplement — Sci Rep. 2012 Jun 28;2:471. doi: 10.1038/srep00471 (PMC3384968; doi:10.1038/srep00471), 2012-06-28
Supplement: srep00471-s1.pdf [file srep00471-s1.pdf]

# Understanding the nature of "superhard graphite"

## Supplementary Information

Salah Eddine Boulfefel,<sup>1,\*</sup> Artem R. Oganov,<sup>1,2</sup> and Stefano Leoni<sup>3</sup>

<sup>1</sup>*Stony Brook University, Department of Geosciences, NY 11794-2100, USA*

<sup>2</sup>*Department of Geology, Moscow State University, 119899 Moscow, Russia*

<sup>3</sup>*Technische Universität Dresden, Institut für  
Physikalische Chemie, 01062 Dresden, Germany*

---

\*Electronic address: [sboulfelfel@notes.cc.sunysb.edu](mailto:sboulfelfel@notes.cc.sunysb.edu)

## I. DFTB PARAMETERS FOR CARBON

DFTB total energy calculations were performed using DFTB+ code, version 1.1 (Aradi B, Hourahine B, Frauenheim Th (2007) DFTB+, a Sparse Matrix-Based Implementation of the DFTB Method *J Phys Chem A* 111:5678-5684), and the dispersion correction was included to account for van der Waals interactions between graphitic layers (Zhechkov L, Heine T, Patchkovskii S, Seifert G, Duarte HA (2005) An efficient *a Posteriori* treatment for dispersion interaction in density-functional-based tight binding *J Chem Theory Comput* 1:841-847).

DFT total energy calculations were performed using QUANTUM ESPRESSO package, version 4.3.2 (Giannozzi P *et al.* (2009) QUANTUM ESPRESSO: a modular and open-source software project for quantum simulations of materials *J Phys: Condens Matter* 21:395502-395521), and the dispersion correction was included to account for van der Waals interactions between graphitic layers (Barone V *et al.* (2009) Role and effective treatment of dispersive forces in materials: Polyethylene and graphite crystals as test cases *J Comp Chem* 30:934-939 and Grimme S (2006) Semiempirical GGA-type density functional constructed with a long-range dispersion correction *J Comp Chem* 27:1787-1799).

For both DFT and DFTB, a full variable-cell relaxation was performed for each structure.

The dispersion correction stabilized hexagonal graphite by 87 meV/atom (Fig. 1) and 62 meV/atom (Fig. 2) using DFTB and DFT (GGA), respectively.

TABLE I: Comparison between DFT and DFTB total energies of different structures of carbon investigated in TPS simulations.

|                    | DFT-LDA          | DFT-GGA          | DFTB            |
|--------------------|------------------|------------------|-----------------|
| graphite           | -155.682 (0.000) | -155.161 (0.000) | -46.985 (0.000) |
| diamond (cubic)    | -155.535 (0.147) | -154.910 (0.251) | -46.796 (0.189) |
| <i>W</i> -carbon   | -155.356 (0.326) | -154.755 (0.406) | -46.607 (0.378) |
| <i>M</i> -carbon   | -155.347 (0.335) | -154.747 (0.414) | -46.602 (0.383) |
| bct C <sub>4</sub> | -155.304 (0.378) | -154.712 (0.449) | -46.574 (0.411) |

Energies are given in eV/atom.

Dispersion correction used for graphite in both DFT and DFTB.

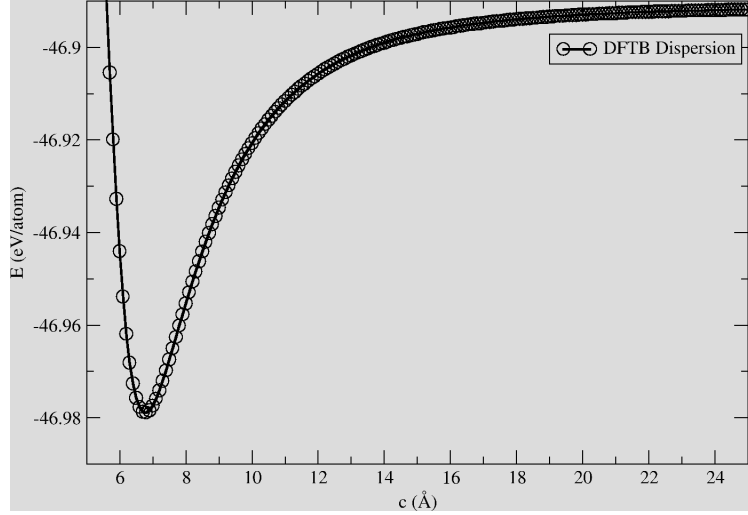

FIG. 1: DFTB total energy variation of graphite in function of interlayer separation. Dispersion correction was included to account for van der Waals interactions. For each step, the structure was relaxed within  $ab$  plane while keeping  $c$  unchanged.

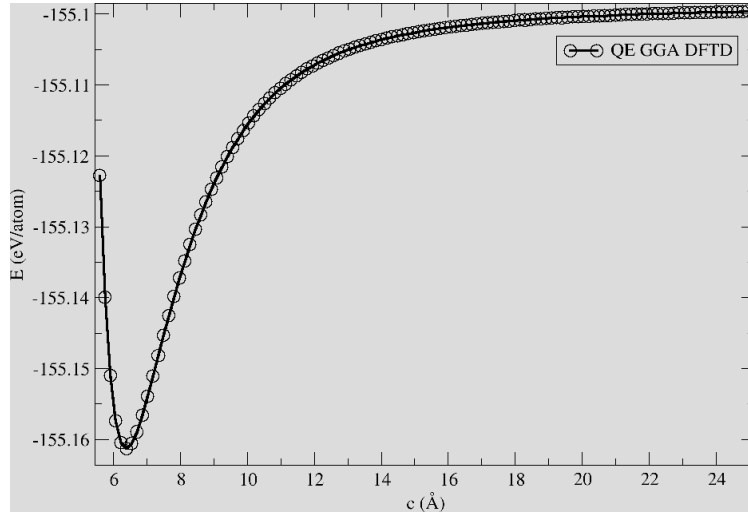

FIG. 2: DFT total energy variation of graphite in function of interlayer separation. Dispersion correction was included to account for van der Waals interactions. For each step, the structure was relaxed within  $ab$  plane while keeping  $c$  unchanged.

## II. ORIENTATION RELATIONS BETWEEN GRAPHITE AND $oC16$ STRUCTURES

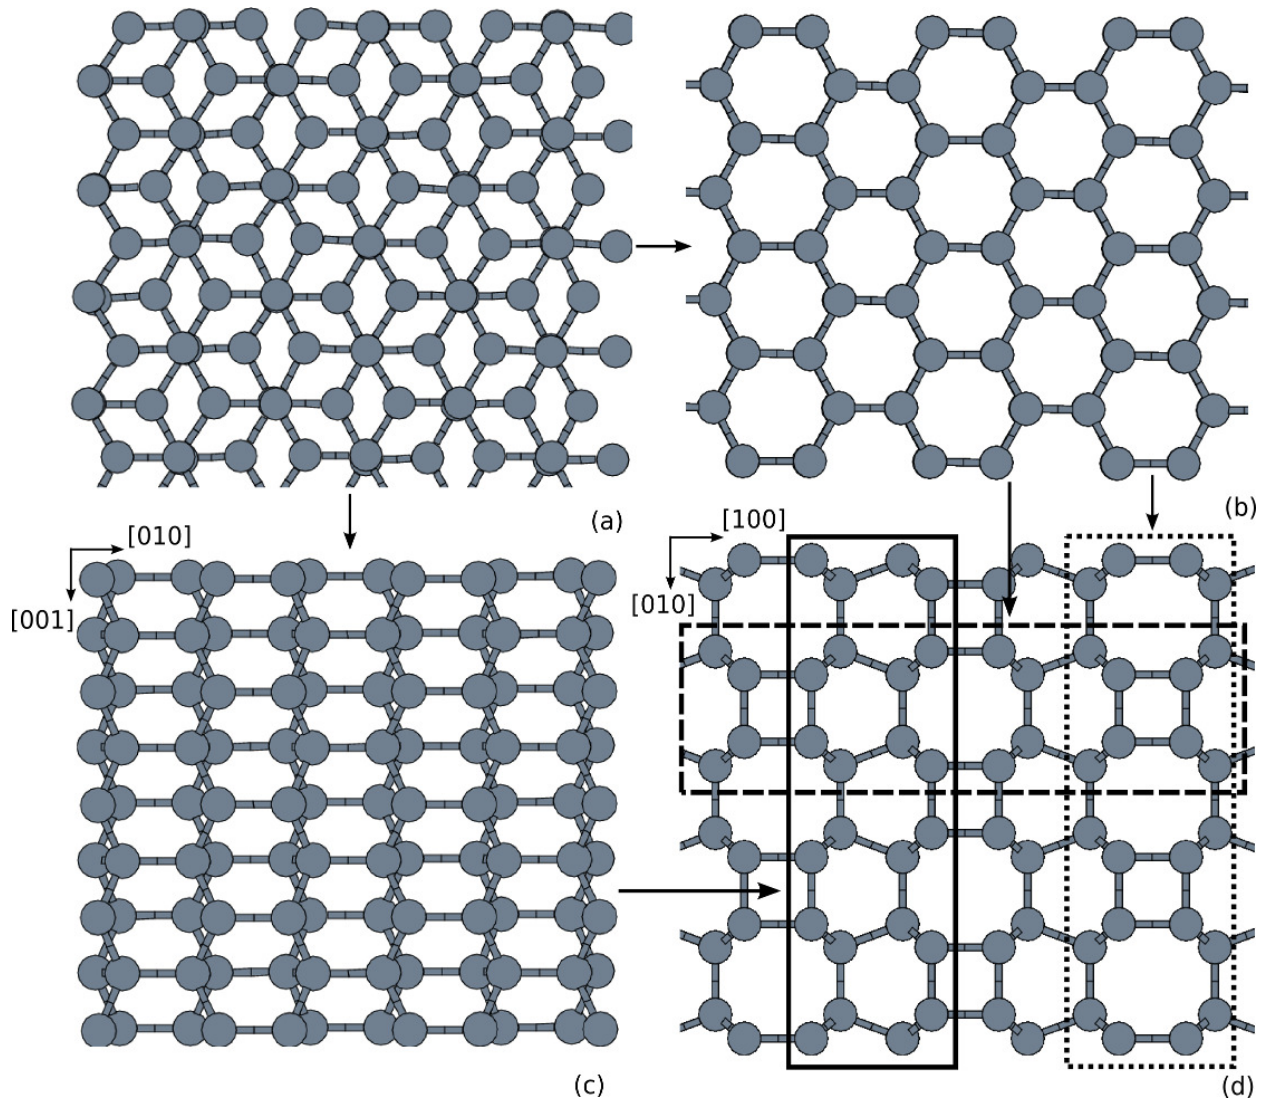

FIG. 3: Different sliding mechanisms for the (a) graphite to (d) *oC16* transformation. Three different slabs of *oC16* are highlighted with plain, dotted, and dashed frames and the stacking is compared to graphite. Large atomic displacements in terms of graphitic layer sliding in order to initiate nucleation of *oC16* structure.
